# Supplementary material
Source: Springer Nature journal article supplement (https://www.springermedizin.de/resource/supplementary/12889_2009_1451_MOESM1_ESM.pdf/9504278)

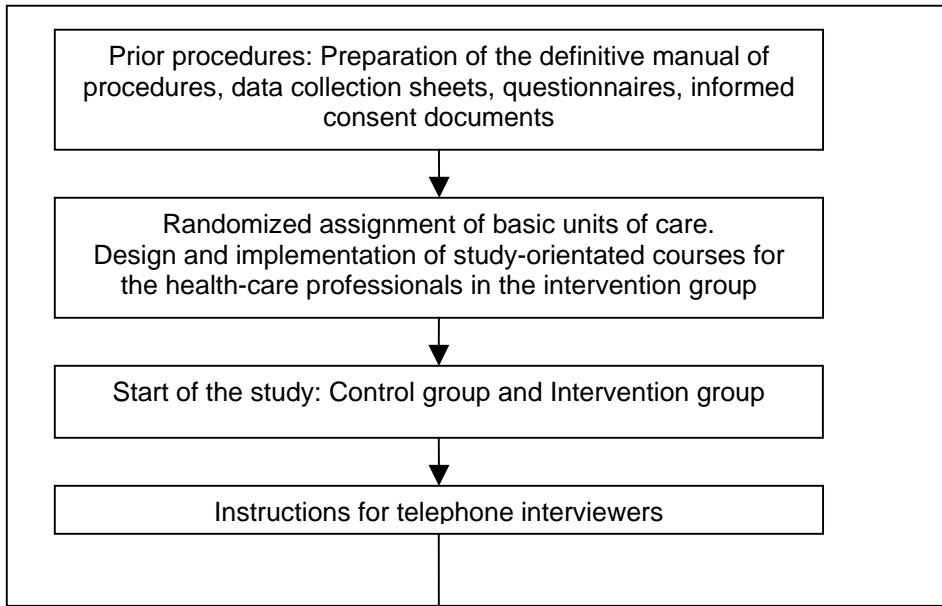

Pre-preparatory phase

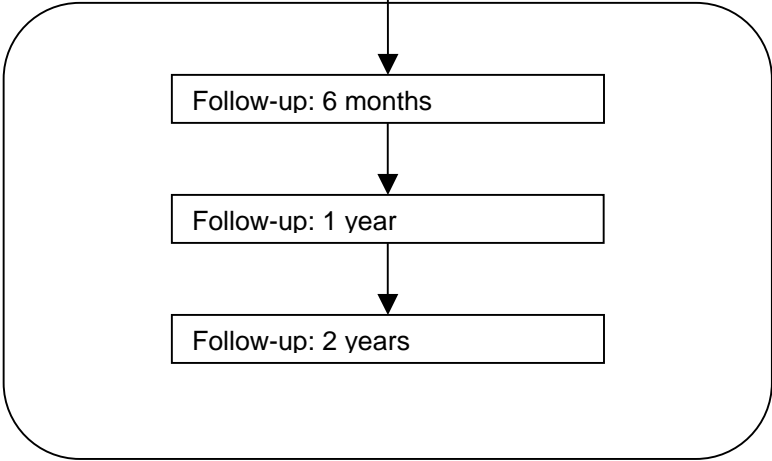

Field-work

Supplement: MOESM1 [file 9504278]
